# Supplementary material
Source: Springer Nature journal article supplement (https://www.springermedizin.de/resource/supplementary/12985_2007_366_MOESM1_ESM.pdf/9607924)

A.

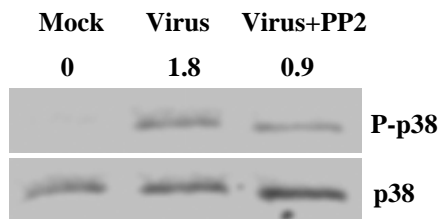

B.

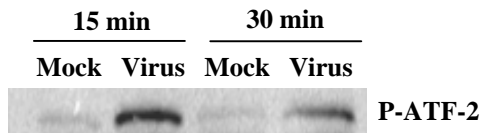

C.

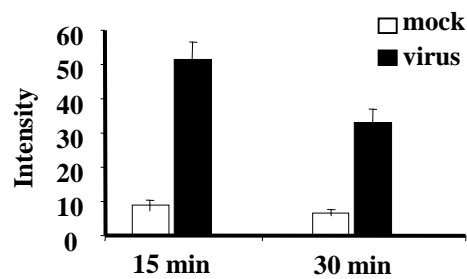

D.

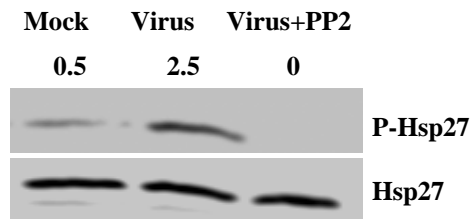

E.

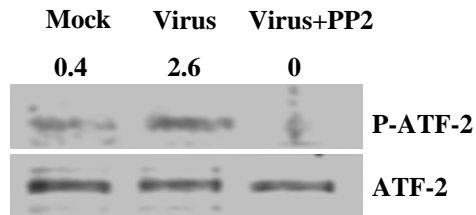

Supplement: MOESM1 [file 9607924]
